# Supplementary material
Source: Springer Nature journal article supplement (https://www.springermedizin.de/resource/supplementary/40169_2014_68_MOESM3_ESM.pdf/9675508)

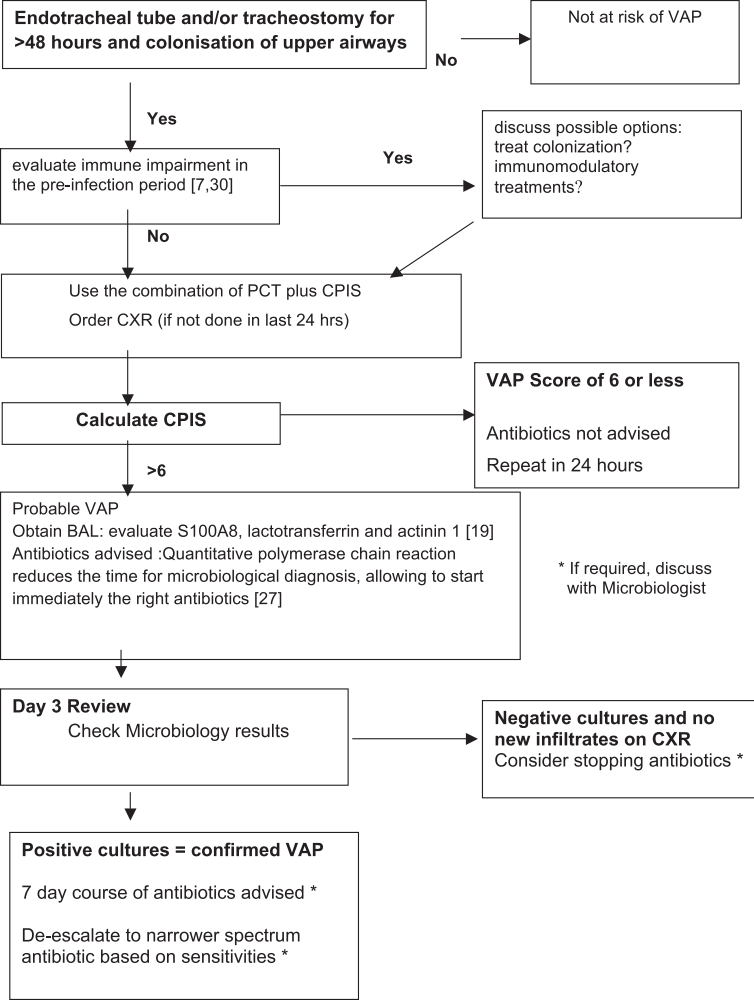

Supplement: MOESM3 [file 9675508]
